# Supplementary material
Source: MDPI journal article supplement (https://www.mdpi.com/2073-4395/13/3/811)
Supplement: s1 [file s1]

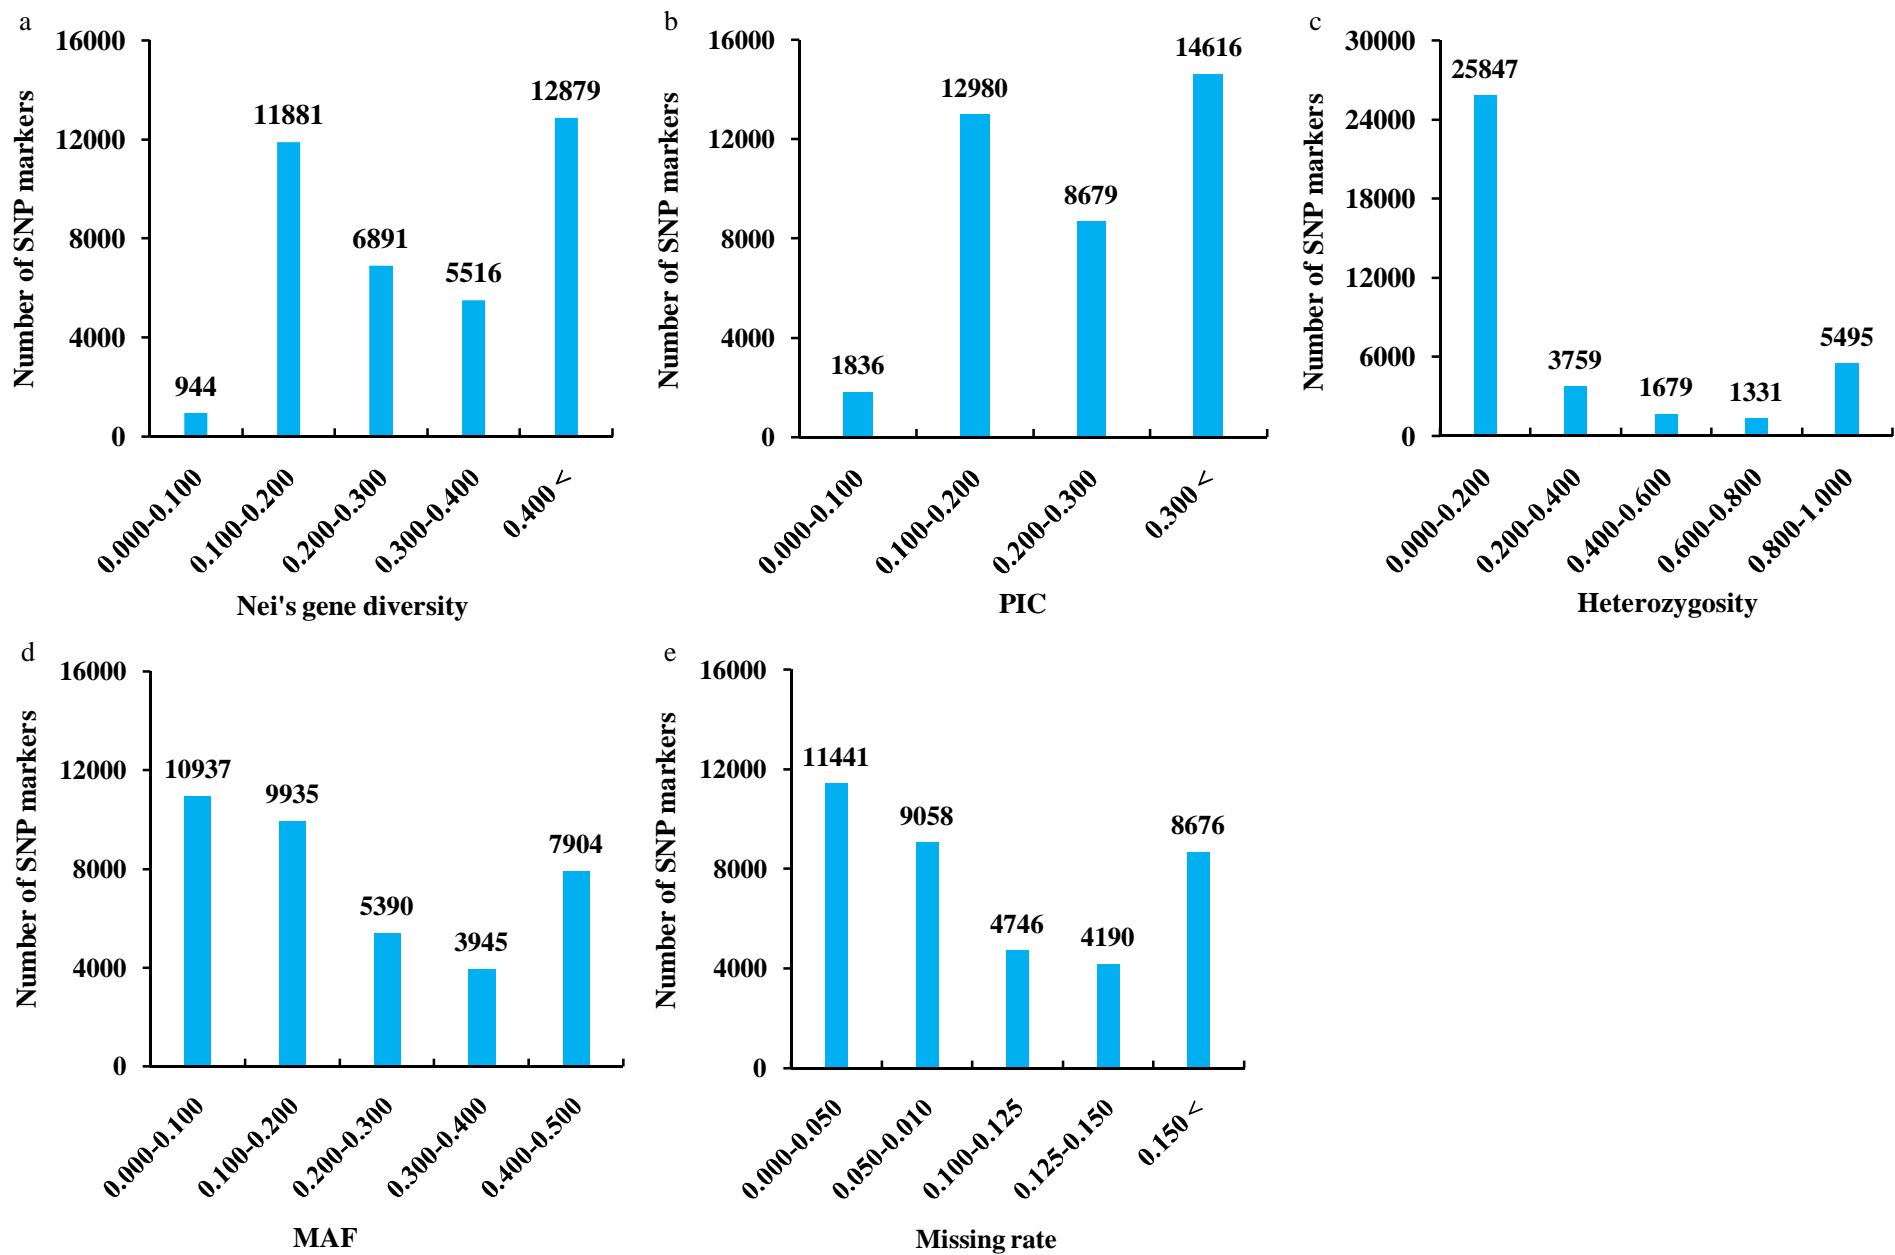

**Figure S1.** The genetic diversity indices of 38111 SNP markers based on 410 faba bean germplasm collections: (a) The Nei's gene diversity; (b) The polymorphism information content (PIC); (c) The heterozygosity; (d) The minor allele frequency (MAF); (e) The rate of occurrence of missing values.
